# Supplementary material for: Simple furan-based polymers with the self-healing function enable efficient eco-friendly organic solar cells with high stability
Source: Royal Society of Chemistry journal article supplement (doi:10.1039/d1tc05111c), 2021-11-29
Supplement: d1tc05111c1.pdf [file d1tc05111c1.pdf]

# Simple furan-based polymers featuring self-healing function enable efficient eco-friendly organic solar cells with high stability

Luwen Shang<sup>1</sup>, Shengchun Qu<sup>2</sup>, Yingying Deng<sup>1</sup>, Yueyue Gao<sup>1,\*</sup>, Gentian Yue<sup>1</sup>, Furui Tan<sup>1,\*</sup>,  
Shenghua He<sup>1</sup>, Zhijie Wang<sup>2,\*</sup>, Zhangguo Wang<sup>2</sup>

<sup>1</sup>Key Laboratory of Photovoltaic Materials, Henan University, Kaifeng 475004, P. R. China.

Email: gaoyueyue@henu.edu.cn; frtan@henu.edu.cn

<sup>2</sup>Key Laboratory of Semiconductor Materials Science, Beijing Key Laboratory of Low Dimensional Semiconductor Materials and Devices, Institute of Semiconductors, Chinese Academy of Sciences, Beijing 100083, P. R. China.

Email: [wangzj@semi.ac.cn](mailto:wangzj@semi.ac.cn)

## 1. Experimental section

### 1.1 Materials

Anhydrous toluene and tetrahydrofuran (THF) were used after being dried over sodium/benzophenone. P3HT, PC<sub>71</sub>BM, PTB7-Th and ITIC were purchased from Solarmer Inc company. PM6 and Y6 were purchased from Zhiyan Company (Nanjing, China). PCBO-12 was prepared according to the reported work.<sup>1</sup> Unless otherwise noted, other chemicals with chemically pure grade were purchased from Energy Chemical (Shanghai, China) and used as received without further purification.

### 1.2. Materials characterization

AVANCE III HD 400 MHz instrument using deuteriochloroform (CDCl<sub>3</sub>) as solvent and tetramethylsilane as reference was implemented to obtain the <sup>1</sup>H-NMR

spectra. Spectrum Two infrared spectrometer was adopted to get the IR spectra. The gel permeation chromatography (GPC) with polystyrene as a standard and THF as the eluent at room temperature was performed with the assistance of Agilent PL-GPC 50, which was applied to determine the molecular weight ( $M_n/M_w$ ) and polydispersity index ( $PDI$ ) of target polymers. The absorption spectra were studied via UH4150 UV-Vis-NIR spectrophotometer. TAQ600 simultaneous TG-DSC instrument was used for thermogravimetric analysis (TGA) measurements (heating rate of 10 °C/min under  $N_2$ ). X-ray photoelectron spectrometer (XPS, Kratos Axis Ultra) was applied to investigate the composition and chemical structure of the photoactive layer post-treated with different condition. Bruker DEKTAK XT step profiler was applied to measure the thickness of the photoactive layer. CHI600E electrochemical workstation accompanied with a computer was used to carry out the cyclic voltammetry (CV) measurement, where the polymer film coated upon ITO served as the working electrode, platinum wire as the counter electrode and Ag/AgCl as the reference electrode, respectively. It is noted that the CV measurement was conducted with 0.1 M tetrabutylammonium hexafluorophosphate ( $Bu_4NPF_6$ ) in acetonitrile as electrolyte, and with the protection of  $N_2$ .

The relative dielectric constants ( $\epsilon_r$ ) of the PFO3 and PFO4 film were tested via capacitance (C)–voltage (V) measurements via CHI600E electrochemical workstation with a device structure of ITO/ZnO/sample/ $MoO_3$ /Ag and frequency range of  $10^3$ – $10^5$  Hz. The  $\epsilon_r$  is evaluated via the equation:  $C = \epsilon_0 \epsilon_r S/d$ , where  $\epsilon_0$ , S, and d represent the vacuum permittivity ( $8.85 \times 10^{-12} \text{ Fm}^{-1}$ ), device area ( $0.0314 \text{ cm}^2$ ), and thickness of

the tested film, respectively.

### **1.3. Device fabrication**

The devices were fabricated with an inverted structure of ITO/ZnO (30 nm)/polymer:PCBO-12/MoO<sub>3</sub> (~8 nm)/Ag (90 nm). The laser patterned ITO-coated glasses (~12 Ω/sq) were successively cleaned by ultrasonic treatment in detergent, deionized water, acetone and isopropanol for 30 mins. Then, the ITO-coated glasses were quickly dried with nitrogen-flow, and treated with UV-ozone for 15 mins. Next, the ZnO precursor solution was spin-coated upon the ITO-coated glass with 4500 rpm for 30 s.<sup>2</sup> Following, the film was annealed at 220 °C for 40 mins in air, and then was further treated with UV-ozone for 10 mins. Meanwhile, the polymer:PCBO-12 (1:2.5, by weight) blends with a concentration of 5.5 mg/mL and 6.0 mg/mL for PFO3 and PFO4, respectively, were dissolved in ethanol/water (85:15, by volume) and kept stirring at 60 °C for overnight. Before spin-coating, 1.0 % p-anisaldehyde was added into the above solution and consecutively stirred at 60 °C for at least 1.0 h. Then, the polymer:PCBO-12 solution was quickly spin-coated upon the ZnO film via 1300 rpm for 40s, and annealed at 100 °C for 20 mins. To eliminate the residual water, the photoactive layer was dried under high vacuum conditions (10<sup>-5</sup> Pa) for overnight. Finally, MoO<sub>3</sub>/Ag (~8 nm/90 nm) was successively evaporated onto the photoactive layer under pressure of ~8.0 ×10<sup>-5</sup> Pa. The active area of devices was defined by the shadow mask with 3.14 mm<sup>2</sup>.

### **1.4. Device characterization**

The current density-voltage ( $J$ - $V$ ) curves of devices were obtained using a Keithley 2400 source-meter when devices were illuminated under AM 1.5G illumination of 100 mW/cm<sup>2</sup> (Newport, Class A), where the light intensity was adopted a NREL-certified monocrystal silicon cell for calibration prior to measuring. The scan rate was fixed at 50 mV/s from -0.5 V to 1.0 V with 10 mV voltage steps. In the process of the measurement of  $J$ - $V$ , the device was placed in inert atmosphere (~28 °C, V<sub>O2</sub>≤1ppm, V<sub>H2O</sub>≤1ppm). The active area (0.0314 cm<sup>2</sup>) was determined using an aperture shade mask. The incident photon-to-electron conversion efficiency (IPCE) spectra were measured with a commercial photo modulation spectroscopic setup that included a Xenon lamp, an optical chopper, a monochromator, and a lock-in amplifier operated by a PC computer. Meanwhile, a calibrated Si photodiode was used as a standard in the IPCE measurement.

A self-designed system under dark was applied to conduct the TPC and TPV measurements, in which the photocurrent or photovoltage decay process was recorded by a digital oscilloscope (Tektronix, DPO 7104).

The charge mobility was characterized via the space charge limited current (SCLC) method, where single-carrier devices with structure of ITO/MoO<sub>3</sub> (10 nm)/polymer:PCBO-12/MoO<sub>3</sub> (5 nm)/Ag (90 nm) or ITO/ZnO (30 nm)/polymer:PCBO-12/Ca (10 nm)/Al (100 nm) were fabricated for measuring the hole and the electron mobilities, respectively. The  $J$ - $V$  curves for the hole-only or electron-only devices were measured and fitted to calculate the mobility based on the following equation.

$$J = \frac{9\varepsilon_0\varepsilon_r\mu V^2}{8L^3}$$

And  $J$ ,  $L$ ,  $\mu$ ,  $\varepsilon_r$  and  $\varepsilon_0$  in the above equation represent the current density, the film thickness of the active layer, the charge (hole or electron) mobility, the relative dielectric constant of PTs, and the permittivity of free space ( $8.85 \times 10^{-12} \text{ Fm}^{-1}$ ), respectively.

The photocurrent density ( $J_{ph}$ ) versus the effective voltage ( $V_{eff}$ ) curves was applied to investigate the exciton dissociation and charge collection properties, in which  $J_{ph} = J_L - J_D$ , where  $J_L$  and  $J_D$  are photocurrent densities under illumination and dark conditions, respectively.<sup>3</sup>  $V_{eff} = V_0 - V_{bias}$ , where  $V_0$  is the voltage at which  $J_{ph}$  is zero and  $V_{bias}$  is the applied external bias voltage. The value of exciton dissociation probability  $P_{diss}$  could be calculated via  $P_{diss} = J_{ph}/J_{sat}$ , where  $J_{sat}$  is the saturation photocurrent density).

Multimode 8 scanning probe microscope in tapping mode was applied to get the AFM height and phase images of the photoactive layer. TEM patterns were acquired on JEOL JEM-2100 microscope (accelerating voltage, 200 kV), where the sample was prepared by spin-casting polymer:PCBO-12 solution onto copper grids attached to glass under optimized device fabricating conditions. Grazing incidence wide-angle X-ray scattering (GIWAXS) experiments were performed at South China University of Technology in China. The photoactive layer for the GIWAXS measurements were prepared on ZnO-coated ITO substrate according to the optimized device conditions.

## 1.5. Material synthesis

### *Synthesis of 2*

The 3-furoic acid (1.12 g, 10 mmol) and glacial acetic acid (60 mL) were placed into a 250 mL three-necked flask equipped with reflux condensing tube and tail gas receiver. Then, the Br<sub>2</sub> solution in acetic acid (1M, 55 mL) was carefully added to the flask through drop funnel dropwise at room temperature. After that, the mixture was slowly warmed and consecutively stirred at ~90 °C for overnight. Subsequently, the mixture was poured into 200 mL deionized water, and then the saturated solution of Na<sub>2</sub>S<sub>2</sub>O<sub>3</sub> in deionized water was slowly added to the mixture to decolorize. After dehydration and evaporation of the solvent, the crude product was purified by recrystallization from deionized water to obtain compound 2 with 2.31 g (85.6%). <sup>1</sup>H-NMR (400 MHz, DMSO-d<sub>6</sub>, δ ppm): 13.32 (*s*, 1H), 7.41 (*s*, 1H).

#### *Synthesis of 3 for PFO3*

The compound 2 (1.08 g, 4.0 mmol), DMAP (0.19 g, 1.6 mmol), DCC (1.03 g, 5 mmol) and CH<sub>2</sub>Cl<sub>2</sub> (30mL) were placed into a 100 mL single-necked flask. Then, triethylene glycol monomethyl ether (3.28g, 20 mmol) in CH<sub>2</sub>Cl<sub>2</sub> (10mL) was added dropwise into the flask. Following, the mixture was stirred at ~ 25 °C for overnight under N<sub>2</sub> atmosphere. After that, the mixture was poured into deionized water (50 mL), and then extracted with CH<sub>2</sub>Cl<sub>2</sub> (3×30 mL). The organic phase was dried with anhydrous MgSO<sub>4</sub> and the solvent was removed. Finally, the crude product was purified by column chromatography on silica gel using hexane/ethyl acetate (6:5) as eluent, and compound 3 was obtained with 1.35 g (81.1%). <sup>1</sup>H-NMR (400 MHz, CDCl<sub>3</sub>, δ ppm): δ 6.67 (*s*, 1H), 4.33 (*t*, 2H), 3.81 (*t*, 2H), 3.56 (*m*, 8H), 3.30 (*s*, 3H).

#### *Synthesis of 3 for PFO4*

The compound 2 (1.11g, 4.1 mmol), DMAP (0.18 g, 1.5 mmol), DCC (1.03 g, 5 mmol) and CH<sub>2</sub>Cl<sub>2</sub> (30mL) were placed into a 100 mL single-necked flask. Then, tetraethylene glycol monomethyl ether (4.17g, 20 mmol) in CH<sub>2</sub>Cl<sub>2</sub> (10mL) was added dropwise into the flask. Following, the mixture was stirred at ~25 °C for overnight under N<sub>2</sub> atmosphere. After that, the mixture was poured into deionized water (50 mL), and then extracted with CH<sub>2</sub>Cl<sub>2</sub> (3×30 mL). The organic phase was dried with anhydrous MgSO<sub>4</sub> and the solvent was removed. Finally, the crude product was purified by column chromatography on silica gel using petroleum ether/ethyl acetate (6:4) as eluent, and compound 3 was obtained with 1.52 g (80.6%). <sup>1</sup>H-NMR (400 MHz, CDCl<sub>3</sub>, δ ppm): δ 6.64 (*s*, 1H), 4.31 (*t*, 2H), 3.80 (*t*, 2H), 3.54 (*m*, 8H), 3.30 (*s*, 3H).

#### *Synthesis of 5*

The CuI (2.86g, 15.0 mmol), *t*-BuOK (2.58g, 23.0mmol), diethylene glycol monomethyl ether (18.02g, 150.0 mmol) and DMF (60 mL) were placed into a 250 mL three-necked flask equipped with reflux condensing tube and droplet funnel with constant pressure. After the mixture was stirred at room temperature for 2.0h, the 3-bromofuran (10.36g, 70mmol) in DMF (30mL) was added into the flask dropwise via the droplet funnel. Then, the mixture was heated until ~100 °C, and stirred for 24.0 h at this temperature. After that, the mixture was poured into water (100mL) and extracted with CH<sub>2</sub>Cl<sub>2</sub> (3×50 mL). The organic phase was further washed successively with water (3×50 mL) and saturated NaCl solution in water. Following, the organic solution was dried with anhydrous MgSO<sub>4</sub> and the solvent was removed. Finally, the

crude product was purified by vacuum distillation to obtain compound 5 with 10.43 g (80.0%). <sup>1</sup>H-NMR (400 MHz, CDCl<sub>3</sub>, δ ppm): δ 7.01 (*s*, 1H), 6.89 (*d*, 1H), 6.05 (*d*, 1H), 4.31 (*t*, 2H), 3.79 (*t*, 2H), 3.53 (*m*, 4H), 3.30 (*s*, 3H).

#### *Synthesis of 6*

The compound 5 (1.86g, 10.0 mmol) and anhydrous THF (20mL) were placed into a 50 mL single-necked flask. After the flask was vacuumed and refilled with N<sub>2</sub> three times, the flask was placed into the bath full of the mixture of liquid nitrogen and ethanol, whose temperature was about −78 °C, and stirred for ~0.5 h under the N<sub>2</sub> atmosphere. Then, n-BuLi (21.1 mmol, 13.2 mL, 1.6 M in hexane) was injected into the flask via 15 mL injection syringe dropwise. After finished, the mixture was further stirred at −78 °C for 1.0 h. Following, trimethyltin chloride (21 mmol, 21 mL, 1M in hexane) was injected into the flask via 10 mL injection syringe dropwise, then the mixture was stirred at −78 °C for 1.0 h. After that, the flask was gradually warmed to room temperature and stirred for ~6.0 h. The mixture was poured into the water and extracted with diethyl ether (3×30 mL). The organic solution was dried with anhydrous Na<sub>2</sub>SO<sub>4</sub> and the solvent was removed under vacuum. Subsequently, the mixture was quickly passed through a plug of aluminium oxide pretreated with triethylamine, and further purified by vacuum distillation to obtain compound 6 with 4.21 g (82.4%). <sup>1</sup>H-NMR (400 MHz, CDCl<sub>3</sub>, δ ppm): δ 6.26 (*s*, 1H), 4.28 (*t*, 2H), 3.75 (*t*, 2H), 3.51 (*m*, 4H), 3.30 (*s*, 3H), 0.29 (*s*, 18H).

#### *Synthesis of PFO3*

The compound 3 (104 mg, 0.25 mmol) and compound 6 (128 mg, 0.25 mmol)



were placed into a single-neck bottom-flask (25 mL), and the flask was vacuumed and refilled with N<sub>2</sub> three times. Following, Pd<sub>2</sub>(dba)<sub>3</sub> (5 mg) and P(o-tol)<sub>3</sub> (10 mg) were quickly added into the flask, and the flask was once again vacuumed and refilled with N<sub>2</sub> three times. Then, toluene (10 mL) and DMF (1.5mL) were quickly injected into the flask via injection syringe. Subsequently, the mixture was heated at 110 °C for 16 h. Afterwards, 1.00 mmol phenyltri-n-butyltin (home-made) was injected into the flask and the mixture was consecutively stirred for 1.0 h. Then, 1.05 mmol 2-bromobenzene was also injected into the flask and the mixture was further consecutively stirred for 1.0 h. After the reaction was finished, the mixture was poured into hexane and further purified by Soxhlet extraction with hexane, dichloromethane, and chloroform. The extracted solution in chloroform was precipitated into hexane, centrifuged with hexane (3×10 mL), and then dried under vacuum overnight to obtain PFO3 (89.0 mg, 80.2%). GPC (THF): Mn=13.2 KDa; Mw=24.1 KDa; PDI=1.83. <sup>1</sup>H-NMR (300 MHz, CDCl<sub>3</sub>, δ ppm): 7.51 (m, H), 7.23(m, H), 3.77-3.62(br, 16H), 3.42(br, 6H), 1.24(m, 6H). FTIR (cm<sup>-1</sup>): 849, 1103, 1278, 1453, 1614, 2882, 2940, 2970, 3093, 3438. Calcd for C<sub>21</sub>H<sub>30</sub>O<sub>10</sub>: C, 57.01; H, 6.83; O, 36.16; Found (%): C, 57.20; H, 6.91.

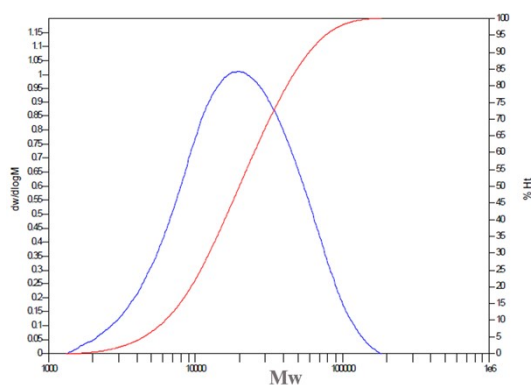

**Fig. S1** The pattern of GPC measurement of PFO3.

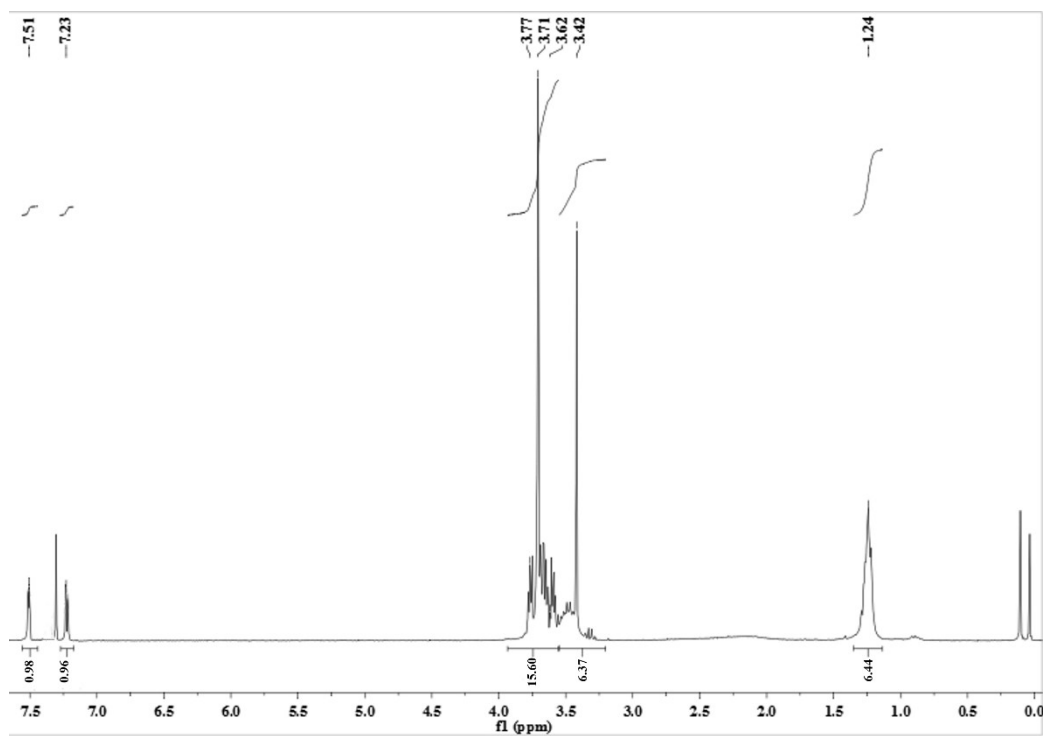

**Fig. S2**  $^1\text{H}$ -NMR spectroscopy of PFO3.

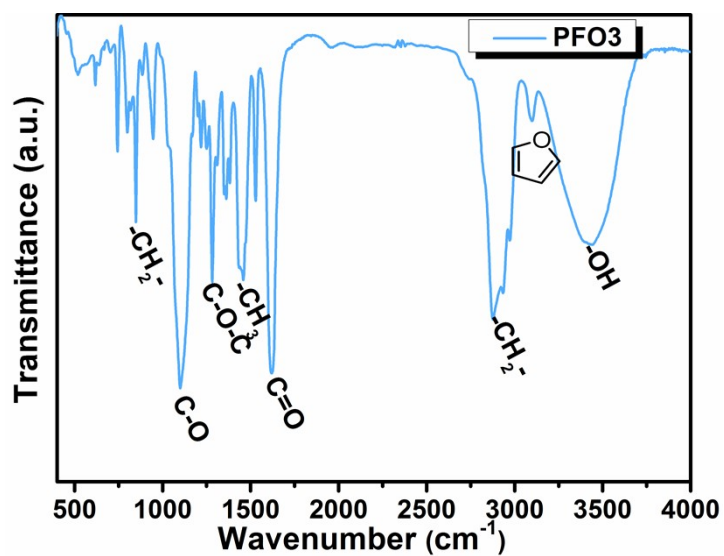

**Fig. S3** FTIR spectroscopy of PFO3.

### *Synthesis of PFO4*

The compound 3 (115 mg, 0.25 mmol) and compound 6 (128 mg, 0.25 mmol) were placed into a single-neck bottom-flask (25 mL), and the flask was vacuumed and refilled with  $\text{N}_2$  three times. Following,  $\text{Pd}_2(\text{dba})_3$  (5 mg) and  $\text{P}(\text{o-tol})_3$  (10 mg) were

quickly added into the flask, and the flask was once again vacuumed and refilled with N<sub>2</sub> three times. Then, toluene (10 mL) and DMF (1.5 mL) were quickly injected into the flask via injection syringe. Subsequently, the mixture was heated at 110 °C for 16 h. Afterwards, 1.00 mmol phenyltri-n-butyltin (home-made) was injected into the flask and the mixture was consecutively stirred for 1.0 h. Then, 1.05 mmol 2-bromobenzene was also injected into the flask and the mixture was further consecutively stirred for 1.0 h. After the reaction was finished, the mixture was poured into hexane and further purified by Soxhlet extraction with hexane, dichloromethane, and chloroform. The extracted solution in chloroform was precipitated into hexane, centrifuged with hexane (3×10 mL), and then dried under vacuum overnight to obtain PFO4 (99.7 mg, 81.7%). GPC (THF): Mn=11.5 KDa; Mw=20.1 KDa; PDI=1.75. <sup>1</sup>H-NMR (300 MHz, CDCl<sub>3</sub>, δ ppm): 7.50(m, H), 7.22(m, H), 3.74-3.63(br, 20H), 3.54(br, 6H), 1.23(m, 6H). FTIR (cm<sup>-1</sup>): 847, 1102, 1285, 1460, 1612, 2873, 2924, 2976, 3102, 3420. Calcd for C<sub>23</sub>H<sub>34</sub>O<sub>11</sub>: C, 56.78; H, 7.04; O, 36.17; Found (%): C, 57.02; H, 7.10.

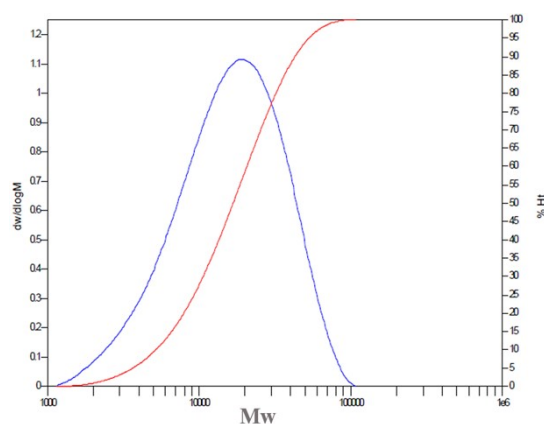

**Fig. S4** The pattern of GPC measurement of PFO4.

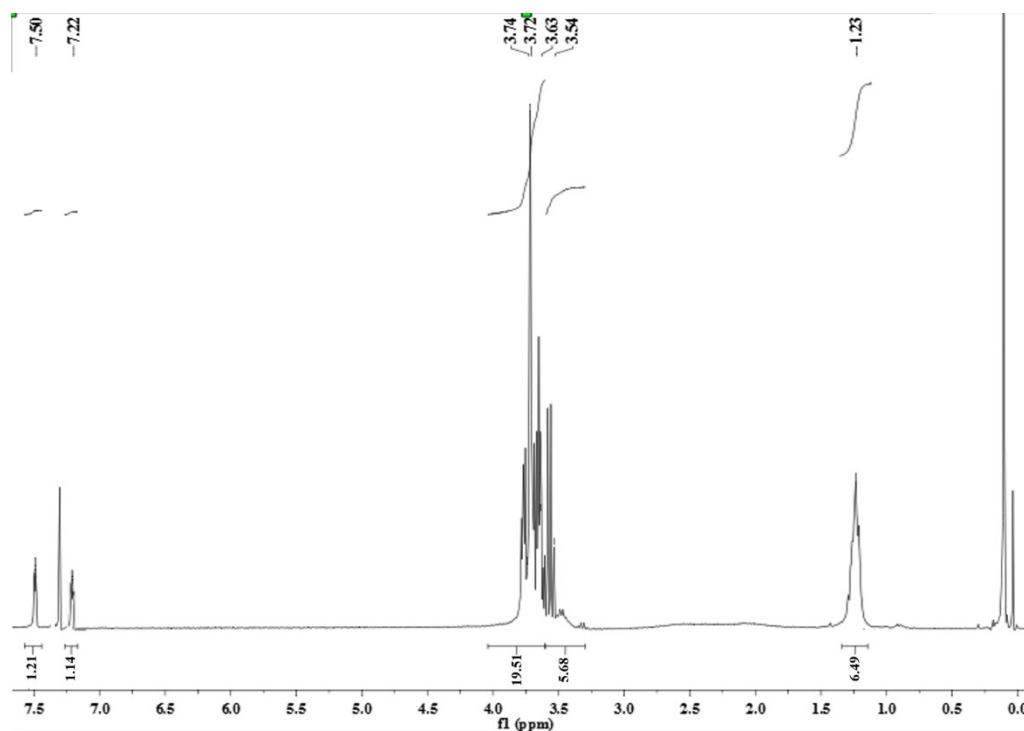

Fig. S5  $^1\text{H}$ -NMR spectroscopy of PFO4.

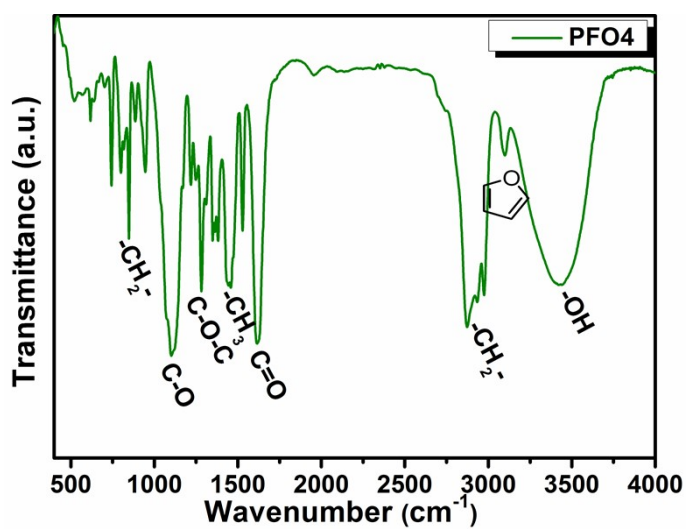

Fig. S6 FTIR spectroscopy of PFO4.

## 2. Result and discussion

**Table S1** The toxicological properties of representative solvents used in OSCs.

| Solvent         | Toxicity | Median lethal dose<br>(mouse) | Allowable<br>concentration in air<br>(ppm) | Environmental<br>friendliness |
|-----------------|----------|-------------------------------|--------------------------------------------|-------------------------------|
| Dichlorobenzene | +++++    | 500mg/kg (rabbit)             | 50                                         | Worst                         |
| Chloroform      | ++++     | 1194mg/kg                     | 50                                         | Worst                         |

|                 |      |            |     |        |
|-----------------|------|------------|-----|--------|
| Chlorobenzene   | ++++ | 1445mg/kg  | 75  | Worst  |
| o-xylene        | ++   | 1500 mg/kg | 100 | Worse  |
| Toluene         | +++  | 5000mg/kg  | 100 | Worse  |
| Tetrahydrofuran | ++   | 1650mg/kg  | 250 | Medium |
| Alcohol/Water   | no   | no         | no  | Good   |

**Table S2** The price of the commercial raw materials in the preparation of PFO3 and PFO4.

| Raw materials                        | CAS        | Price<br>(RMB) | Source                                    |
|--------------------------------------|------------|----------------|-------------------------------------------|
| 3-furoicacid                         | 488-93-7   | 1000/100g      | Beijing Ouhe Technology CO., LTD in China |
| 3-bromofuran                         | 22037-28-1 | 485/25g        | Energy Chemical crop in China             |
| Bromine                              | 7726-95-6  | 198/100mL      | Energy Chemical crop in China             |
| Acetic acid                          | 64-19-7    | 98/500mL       | Energy Chemical crop in China             |
| Diethylene glycol monomethyl ether   | 111-77-3   | 30/100mL       | Energy Chemical crop in China             |
| Triethylene glycol monomethyl ether  | 112-35-6   | 43/100mL       | Energy Chemical crop in China             |
| Tetraethyleneglycol monomethyl ether | 23783-42-8 | 189/25g        | Energy Chemical crop in China             |
| n-butyllithium                       | 109-72-8   | 175/500mL      | Energy Chemical crop in China             |
| Trimethyltin chloride                | 1066-45-1  | 950/100mL      | Energy Chemical crop in China             |
| dimethylaminopyridine                | 1122-58-3  | 61/100g        | Energy Chemical crop in China             |
| dicyclohexylcarbodiimide             | 538-75-0   | 58/100g        | Energy Chemical crop in China             |
| Pd <sub>2</sub> (dba) <sub>3</sub>   | 51364-51-3 | 850/5g         | Energy Chemical crop in China             |
| P(o-tol) <sub>3</sub>                | 6163-58-2  | 85/25g         | Energy Chemical crop in China             |
| CuI                                  | 7681-65-4  | 95/100g        | Energy Chemical crop in China             |
| <i>t</i> -BuOk                       | 865-47-4   | 45/100g        | Energy Chemical crop in China             |
| Anhydrous THF                        | 109-99-9   | 30/500mL       | Prepared in our laboratory                |

|                                               |            |          |                                                     |
|-----------------------------------------------|------------|----------|-----------------------------------------------------|
| Na <sub>2</sub> SO <sub>4</sub>               | 7757-82-6  | 55/500g  | Local manufacturers                                 |
| Anhydrous toluene                             | 108-88-3   | 50/500mL | Prepared in our laboratory                          |
| DMF                                           | 68-12-2    | 90/500mL | Energy Chemical crop in China                       |
| Na <sub>2</sub> S <sub>2</sub> O <sub>3</sub> | 10102-17-7 | 50/500g  | Local manufacturers                                 |
| Dichloromethane                               | 75-09-2    | 50/500mL | Local manufacturers                                 |
| Ethyl acetate                                 | 141-78-6   | 60/500mL | Local manufacturers                                 |
| MgSO <sub>4</sub>                             | 7487-88-9  | 25/500g  | Local manufacturers                                 |
| Chloroform                                    | 67-66-3    | 50/500mL | Local manufacturers                                 |
| Hexane                                        | 110-54-3   | 25/500mL | Local manufacturers                                 |
| Deionized water                               |            | 10/5L    | Local manufacturers                                 |
| Silical gel (200~300 mesh)                    |            | 30/kg    | Yantai Xincheng Silicone Materials Co.,LTD in China |

**Table S3** The statistics of the material cost of PFO3 with 1.0 gram.

|               | Raw materials                                 | Commercial cost<br>(RMB) | Need amount<br>(g) | Total cost<br>(RMB) |
|---------------|-----------------------------------------------|--------------------------|--------------------|---------------------|
| <b>Step 1</b> | 3-furoicacid                                  | 1000/100g                | 1.12               | 11.2                |
|               | Bromine                                       | 198/100mL                | 55 mL              | 108.9               |
|               | Acetic acid                                   | 98/500mL                 | 60 mL              | 11.76               |
|               | Deionized water                               | 10/5L                    | 200 mL             | 0.4                 |
|               | Na <sub>2</sub> S <sub>2</sub> O <sub>3</sub> | 50/500g                  | 15                 | 1.5                 |
|               | Compound 2                                    | 85.6% yield              | 2.31               | 57.9                |
| <b>Step 2</b> | Compound 2                                    |                          | 1.08               | 62.5                |

|        |                          |            |        |       |
|--------|--------------------------|------------|--------|-------|
|        | dimethylaminopyridine    | 61/100g    | 0.19   | 0.12  |
|        | dicyclohexylcarbodiimide | 58/100g    | 1.03   | 0.60  |
|        | Dichloromethane          | 50/500mL   | 30 mL  | 3.0   |
|        | Triethylene glycol       |            |        |       |
|        |                          | 43/100mL   | 3.28   | 1.41  |
|        | monomethyl ether         |            |        |       |
|        | Dichloromethane          | 50/500mL   | 10 mL  | 1.0   |
|        | Deionized water          | 10/5L      | 50 mL  | 0.1   |
|        | Dichloromethane          | 50/500mL   | 90 mL  | 4.5   |
|        | Hexane                   | 25/500mL   | 800 mL | 40    |
|        | Ethyl acetate            | 60/500mL   | 600 mL | 72    |
|        | Compound 3               | 81.1%yield | 1.35   | 137.2 |
| Step 3 | CuI                      | 95/100g    | 2.86   | 2.72  |
|        | <i>t</i> -BuOk           | 45/100g    | 2.58   | 1.16  |
|        | Diethylene glycol        |            |        |       |
|        |                          | 30/100mL   | 18.02  | 5.41  |
|        | monomethyl ether         |            |        |       |
|        | DMF                      | 90/500mL   | 60 mL  | 10.8  |
|        | 3-bromofuran             | 485/25g    | 10.36  | 201   |
|        | DMF                      | 90/500mL   | 30 mL  | 5.4   |
|        | Dichloromethane          | 50/500mL   | 150 mL | 15    |
|        | Deionized water          | 10/5L      | 100 mL | 0.2   |
|        | Compound 5               | 80.0%yield | 10.43  | 23.2  |
| Step 4 | Compound 5               |            | 1.86   | 43.2  |

|                           |                                    |            |         |                             |
|---------------------------|------------------------------------|------------|---------|-----------------------------|
|                           | THF                                | 30/500mL   | 20      | 1.2                         |
|                           | n-butyllithium                     | 175/500mL  | 13.2 mL | 4.62                        |
|                           | Trimethyltin chloride              | 950/100mL  | 21 mL   | 199.5                       |
|                           | diethyl ether                      | 100/500mL  | 60 mL   | 12                          |
|                           | Compound 6                         | 82.4%yield | 4.21    | 61.9                        |
|                           | Compound 3                         | 137.2/g    | 0.104   | 14.27                       |
|                           | Compound 6                         | 61.9/g     | 0.128   | 7.92                        |
|                           | Pd <sub>2</sub> (dba) <sub>3</sub> | 850/5g     | 0.005   | 0.85                        |
|                           | P(o-tol) <sub>3</sub>              | 85/25g     | 0.010   | 0.034                       |
| Step 5 for polymerization | Anhydrous toluene                  | 50/500mL   | 10 mL   | 1.0                         |
|                           | DMF                                | 90/500mL   | 1.5 mL  | 0.27                        |
|                           | Hexane                             | 25/500mL   | 30 mL   | 1.5                         |
|                           | PFO3                               | 80.2%yield | 0.089   | 290.37RMB/g<br>(44.83 \$/g) |

**Table S4** The statistics of the material cost of PFO4 with 1.0 gram.

|        | Raw materials            | Commercial cost<br>(RMB) | Need amount<br>(g) | Total cost<br>(RMB) |
|--------|--------------------------|--------------------------|--------------------|---------------------|
| Step 2 | Compound 2               |                          | 1.11               | 64.3                |
|        | dimethylaminopyridine    | 61/100g                  | 0.18               | 0.11                |
|        | dicyclohexylcarbodiimide | 58/100g                  | 1.03               | 0.60                |
|        | Dichloromethane          | 50/500mL                 | 30 mL              | 3.0                 |



|                           |                                    |            |        |                             |
|---------------------------|------------------------------------|------------|--------|-----------------------------|
|                           | Tetraethyleneglycol                | 189/25g    | 4.17   | 31.5                        |
|                           | monomethyl ether                   |            |        |                             |
|                           | Dichloromethane                    | 50/500mL   | 10 mL  | 1.0                         |
|                           | Deionized water                    | 10/5L      | 50 mL  | 0.1                         |
|                           | Dichloromethane                    | 50/500mL   | 90 mL  | 4.5                         |
|                           | Hexane                             | 25/500mL   | 800 mL | 40                          |
|                           | Ethyl acetate                      | 60/500mL   | 400 mL | 48                          |
|                           | Compound 3                         | 80.6%yield | 1.52   | 127.0                       |
| Step 5 for polymerization | Compound 3                         | 127.0/g    | 0.115  | 14.61                       |
|                           | Compound 6                         | 61.9/g     | 0.128  | 7.92                        |
|                           | Pd <sub>2</sub> (dba) <sub>3</sub> | 850/5g     | 0.005  | 0.85                        |
|                           | P(o-tol) <sub>3</sub>              | 85/25g     | 0.010  | 0.034                       |
|                           | Anhydrous toluene                  | 50/500mL   | 10 mL  | 1.0                         |
|                           | DMF                                | 90/500mL   | 1.5 mL | 0.27                        |
|                           | Hexane                             | 25/500mL   | 30 mL  | 1.5                         |
|                           | PFO4                               | 1.7%yield  | 0.0997 | 262.63RMB/g<br>(40.55 \$/g) |

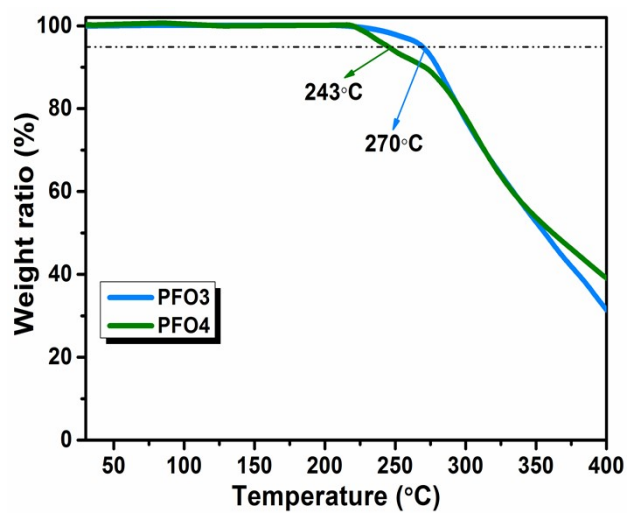

Fig. S7 The thermal gravimetric curves of PFO3 and PFO4.

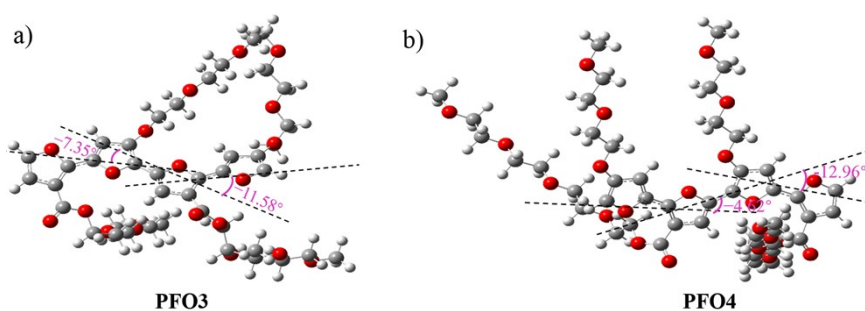

Fig. S8 The top view of PFO3 and PFO4 obtained from DFT calculation.

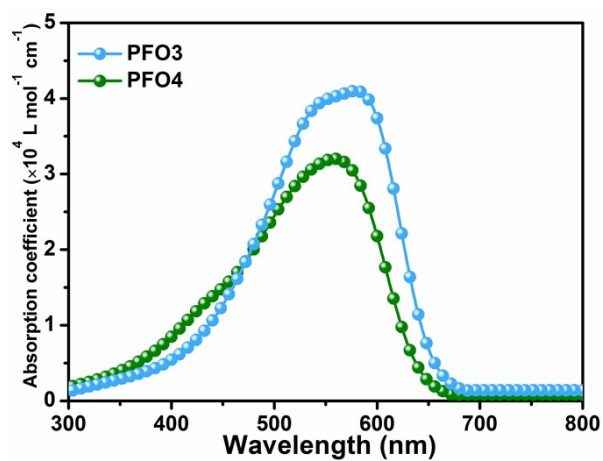

Fig. S9 The UV-Vis absorption spectra of PFO3 and PFO4 in ethanol solution.

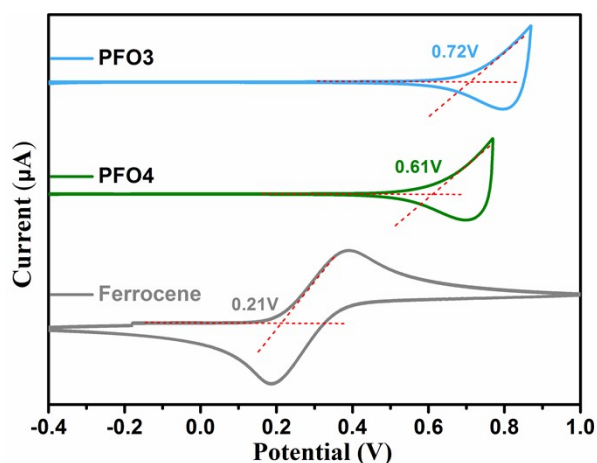

**Fig. S10** The cyclic voltammetric curves of PFO3, PFO4 and ferrocene.

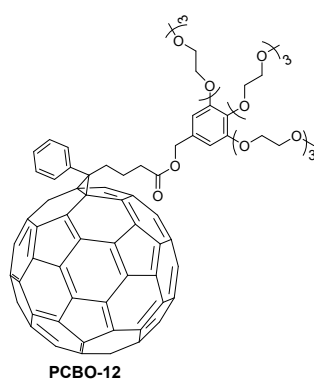

**Fig. S11** The chemical structure of PCBO-12.

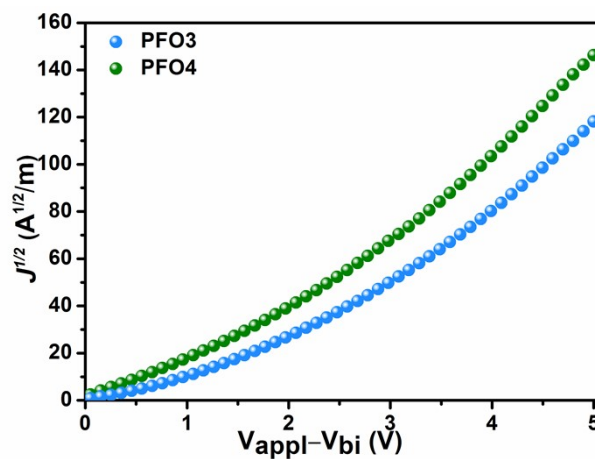

**Fig. S12** The  $J^{1/2}$ - $V$  characteristics of hole-only devices (ITO/MoO<sub>3</sub>/polymer/MoO<sub>3</sub>/Ag) based on PFO3 or PFO4 pristine film processed with ethanol and thermally annealed at 100 °C for 20 min (Note that the pristine PFO3 film was dried under high vacuum conditions (10<sup>-5</sup> Pa) overnight before measurement for eliminating the influence of the residual water)

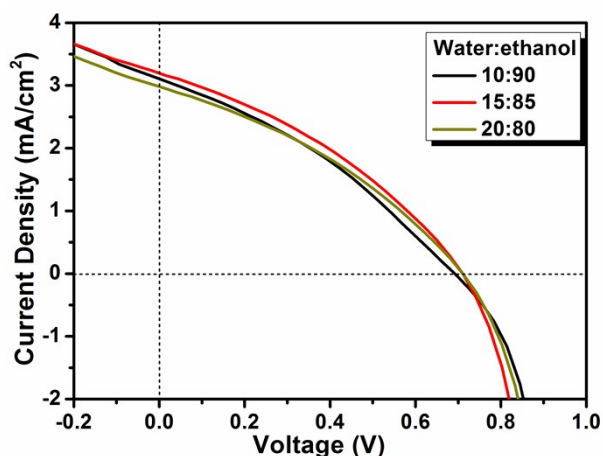

**Fig. S13**  $J$ – $V$  curves of PFO3:PCBO-12 devices with different ratio between water and ethanol as process solvent (other condition is that the concentration of PFO3 is 5.5 mg/mL, the ratio of D:A is 1:2.5 by weight, and dried under high vacuum conditions ( $10^{-5}$  Pa) overnight before thermal deposition of  $\text{MoO}_3$ ).

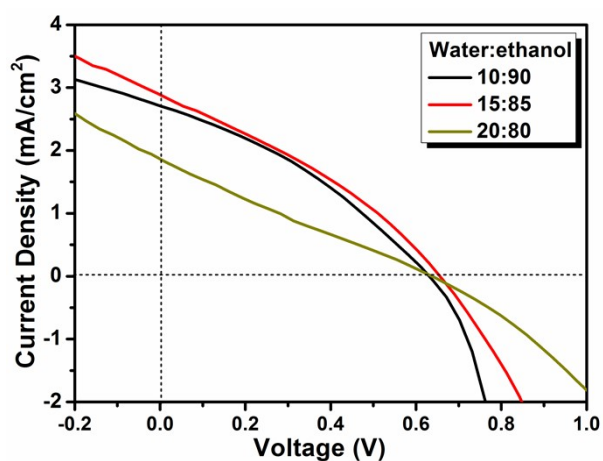

**Fig. S14**  $J$ – $V$  curves of PFO4:PCBO-12 devices with different ratio between water and ethanol as process solvent (other condition is that the concentration of PFO4 is 6.0 mg/mL, the ratio of D:A is 1:2.5 by weight, and dried under high vacuum conditions ( $10^{-5}$  Pa) overnight before thermal deposition of  $\text{MoO}_3$ ).

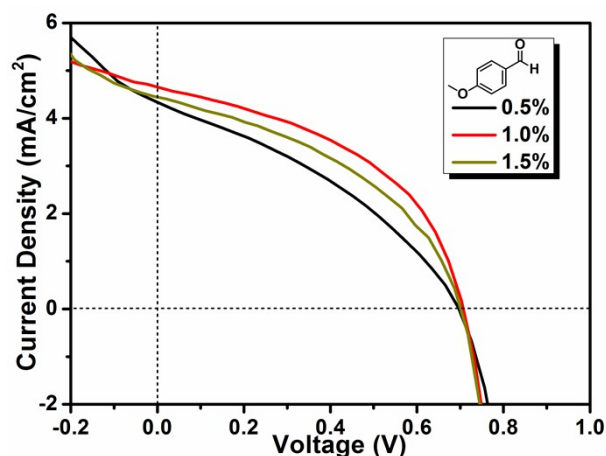

**Fig. S15**  $J$ - $V$  curves of PFO3:PCBO-12 devices with different concentration of p-anisaldehyde additive (other condition is that the concentration of PFO3 is 5.5 mg/mL, the ratio of D:A is 1:2.5 by weight, the ratio of water:ethanol is 15:85, and dried under high vacuum conditions ( $10^{-5}$  Pa) overnight before thermal deposition of  $\text{MoO}_3$ ).

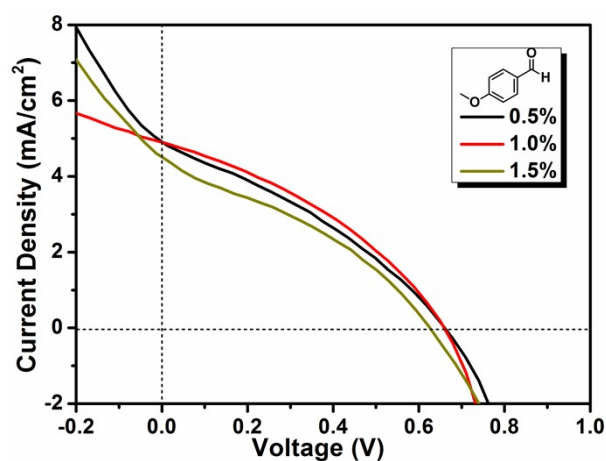

**Fig. S16**  $J$ - $V$  curves of PFO4:PCBO-12 devices with different concentration of p-anisaldehyde additive (other condition is that the concentration of PFO4 is 6.0 mg/mL, the ratio of D:A is 1:2.5 by weight, the ratio of water:ethanol is 15:85, and dried under high vacuum conditions ( $10^{-5}$  Pa) overnight before thermal deposition of  $\text{MoO}_3$ ).

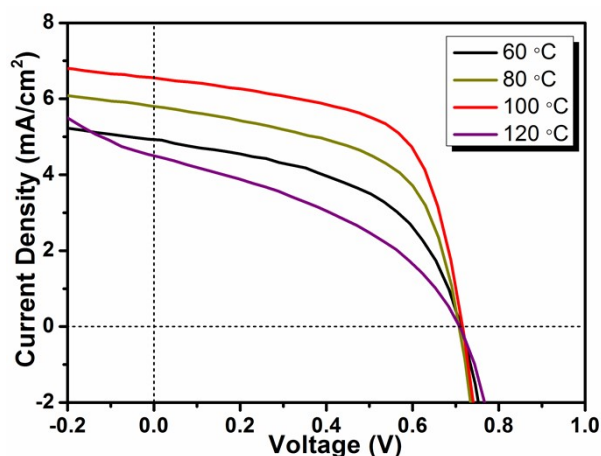

**Fig. S17**  $J$ – $V$  curves of PFO3:PCBO-12 devices with different thermal annealing temperature (other condition is that the concentration of PFO3 is 5.5 mg/mL, the ratio of D:A is 1:2.5 by weight, the ratio of water:ethanol is 15:85, 1.0% of the additive and dried under high vacuum conditions ( $10^{-5}$  Pa) overnight before thermal deposition of  $\text{MoO}_3$ ).

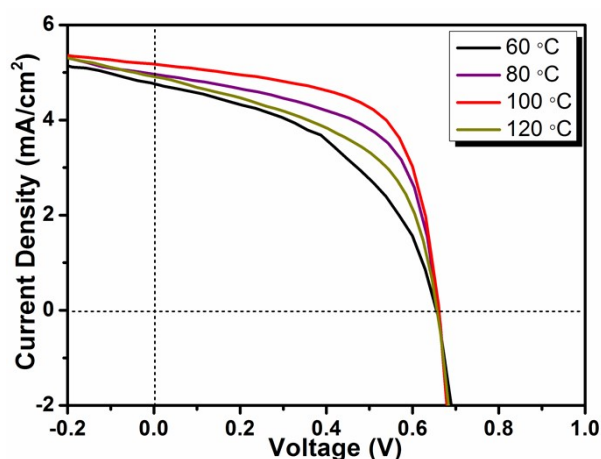

**Fig. S18**  $J$ – $V$  curves of PFO4:PCBO-12 devices with different thermal annealing temperature for 20 mins (other condition is that the concentration of PFO4 is 6.0 mg/mL, the ratio of D:A is 1:2.5 by weight, the ratio of water:ethanol is 15:85, 1.0% of the additive and dried under high vacuum conditions ( $10^{-5}$  Pa) overnight before thermal deposition of  $\text{MoO}_3$ ).

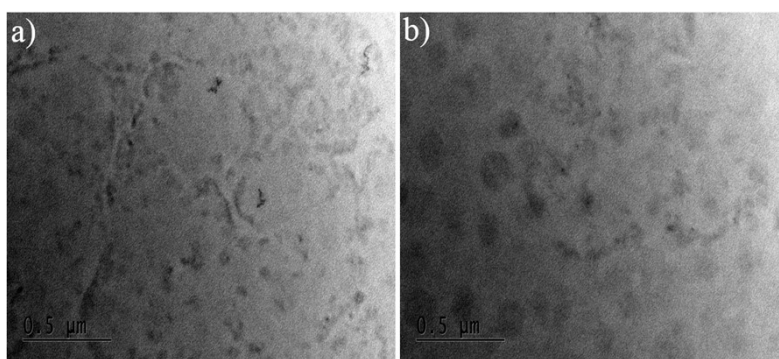

**Fig. S19** TEM images of a) PFO3:PCBO-12 film and b) PFO3:PCBO-12 film processed with

ethanol.

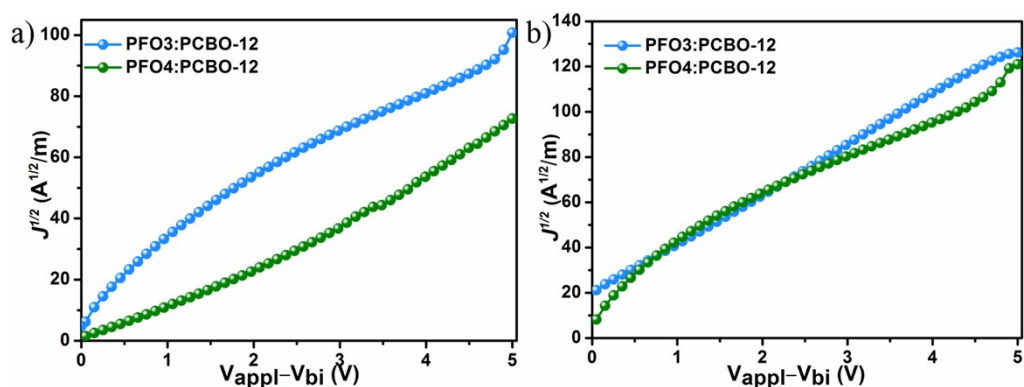

**Fig. S20** The  $J^{1/2}$ - $V$  characteristics of hole-only devices (ITO/MoO<sub>3</sub>/polymer:PCBO-12/MoO<sub>3</sub>/Ag) and electron-only devices (ITO/ZnO/polymer:PCBO-12/Ca/Al), and the condition for the preparing the blend film is as same as the condition of optimized devices.

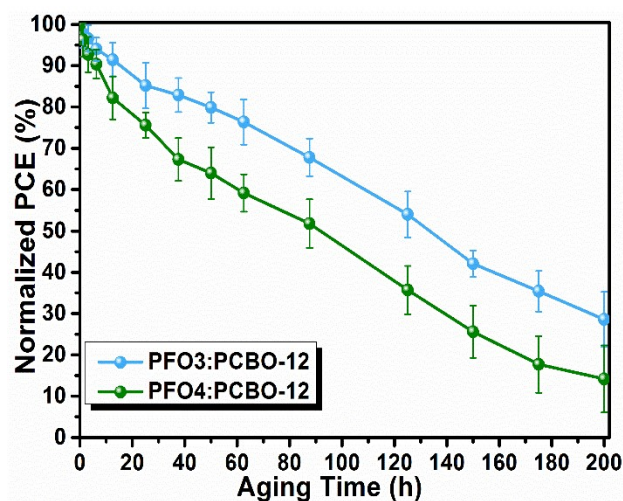

**Fig. S21** The stability of optimized devices under high humid environment (relative humidity of ~60%) for different time.

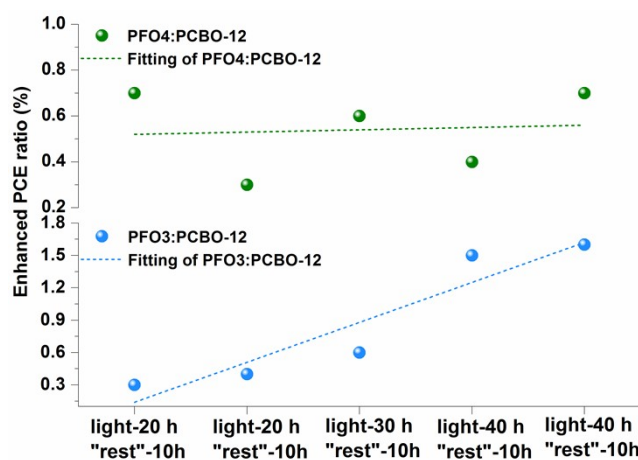

**Fig. S22** The enhanced PCE ratio of devices based on PFO3:PCBO-12 and PFO4:PCBO-12 after every interval of 10 h under darkness.

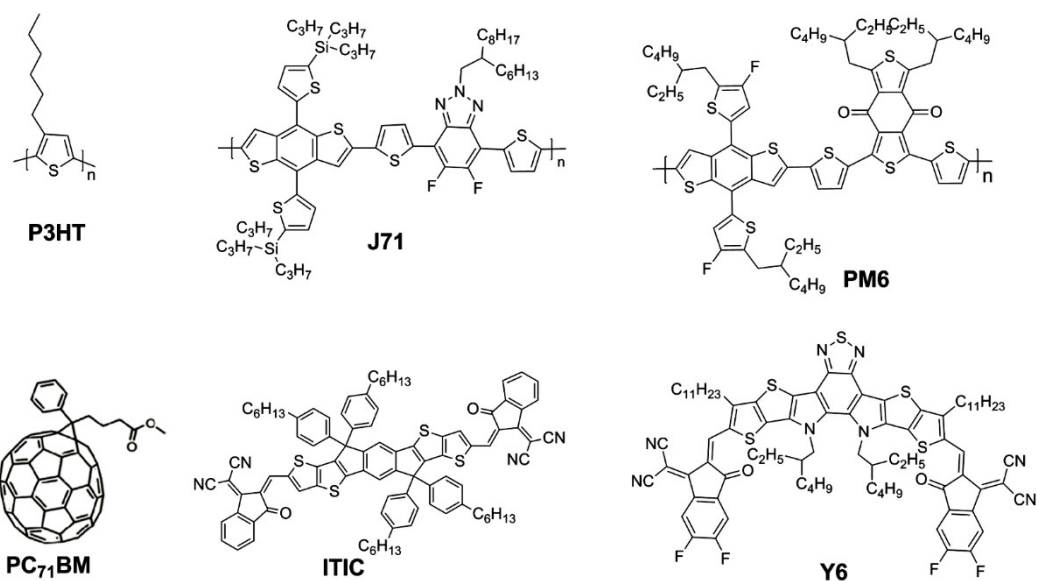

**Fig. S23** The chemical structure of other three photovoltaic systems without abundant OEG side chains.

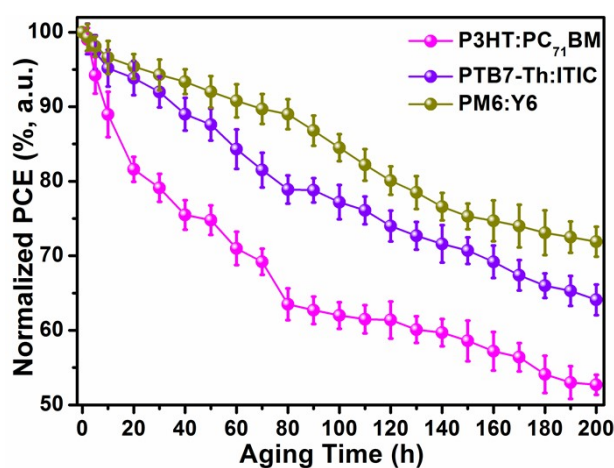

**Fig. S24** The stability of devices based on three different photovoltaic systems with continuous light-soaking for 200 h in inert atmosphere.

**Table S5** The remained PCE ratio of devices with continuous light-soaking (CLS) or discontinuous light-soaking (DLS) for same illumination time of 200 h in air.

| Photoactive layer        | Remained PCE ratio | Remained PCE ratio | Variation PCE ratio                       |
|--------------------------|--------------------|--------------------|-------------------------------------------|
|                          | (CLS)              | (DLS)              | $\frac{PCE_{DLS} - PCE_{CLS}}{PCE_{CLS}}$ |
| P3HT:PC <sub>71</sub> BM | 52.6%              | 53.6%              | 1.9%                                      |
| PTB7-Th:ITIC             | 64.2%              | 65.0%              | 1.2%                                      |
| PM6:Y6                   | 71.7%              | 72.6%              | 1.3%                                      |
| PFO3:PCBO-12             | 64.5%              | 81.6%              | 26.5%                                     |
| PFO4:PCBO-12             | 51.2%              | 69.1%              | 35.0%                                     |



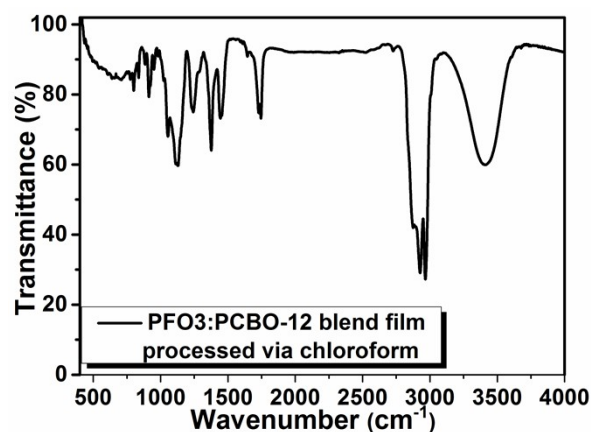

**Fig. S25** The FTIR spectroscopy of PFO3:PCBO-12 blend film.

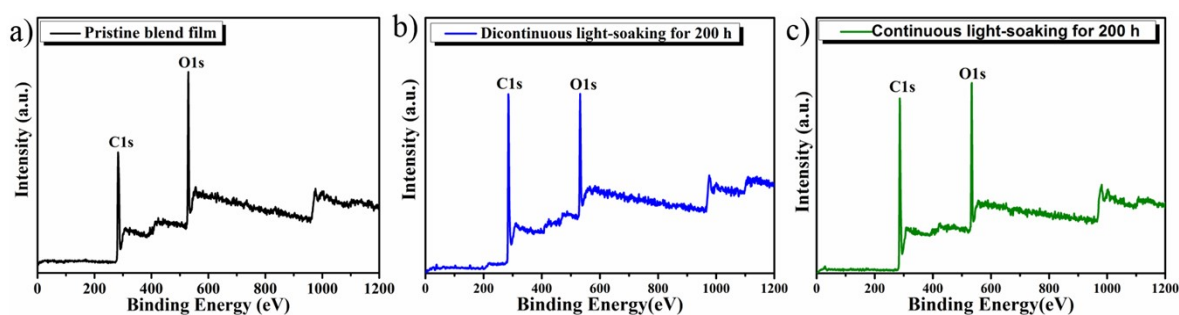

**Fig. S26** The XPS spectra of a) the PFO3:PCBO-12 blend film, b) the aged DCLS-PFO3:PCBO-12 film, c) the aged CLS-PFO3:PCBO-12 film.

## Reference

1. Y. Kim, J. Choi, C. Lee, Y. Kim, C. Kim, T. L. Nguyen, B. Gautam, K. Gundogdu, H. Y. Woo and B. J. Kim, *Chem. Mater.*, 2018, **30**, 5663-5672.
2. Y. Sun, J. H. Seo, C. J. Takacs, J. Seifter and A. J. Heeger, *Adv. Mater.*, 2011, **23**, 1679-1683.
3. C. Jiao, Z. Guo, B. Sun, Y.-q.-q. Yi, L. Meng, X. Wan, M. Zhang, H. Zhang, C. Li and Y. Chen, *J. Mater. Chem. C*, 2020, **8**, 6293-6298.
